# Supplementary material
Source: Springer Nature journal article supplement (https://www.springermedizin.de/resource/supplementary/12881_2008_434_MOESM3_ESM.pdf/9450646)

**A) Single marker association scores**

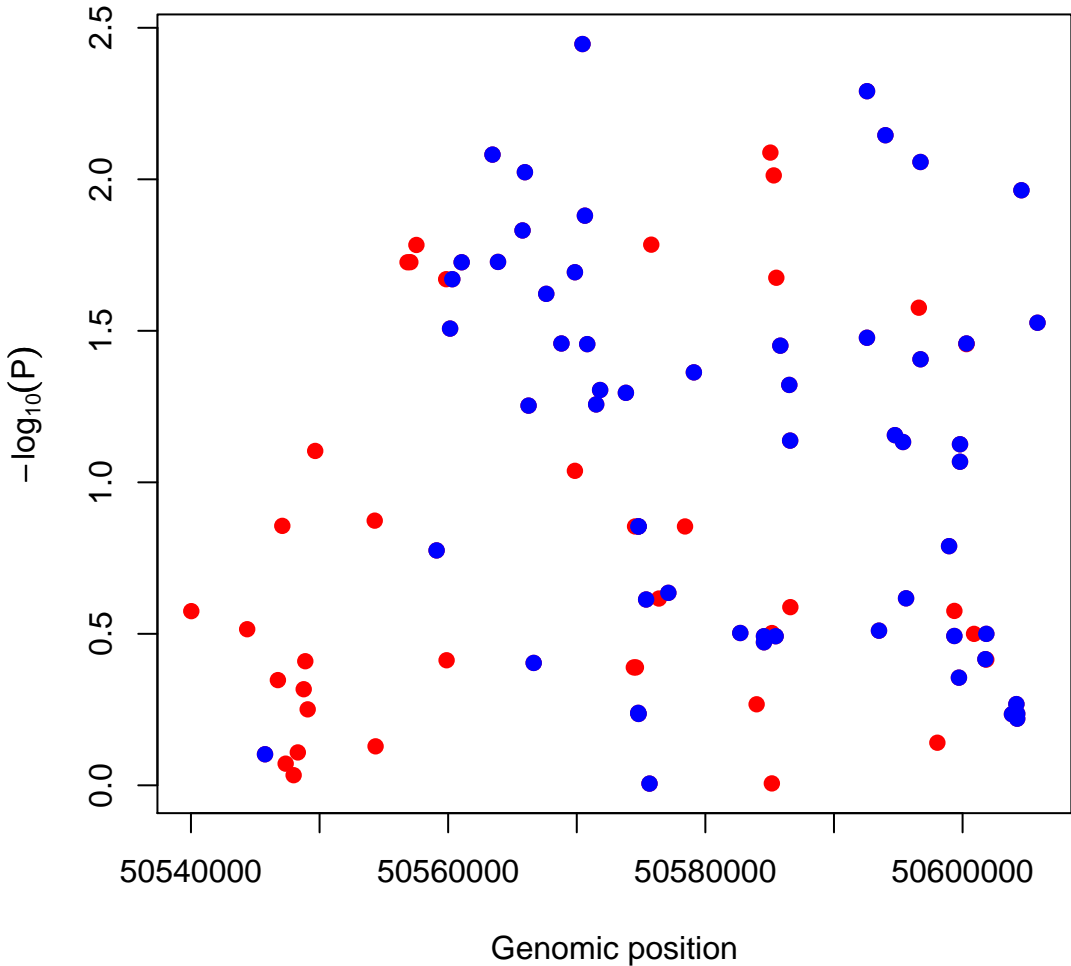

**B) Blossoc association scores**

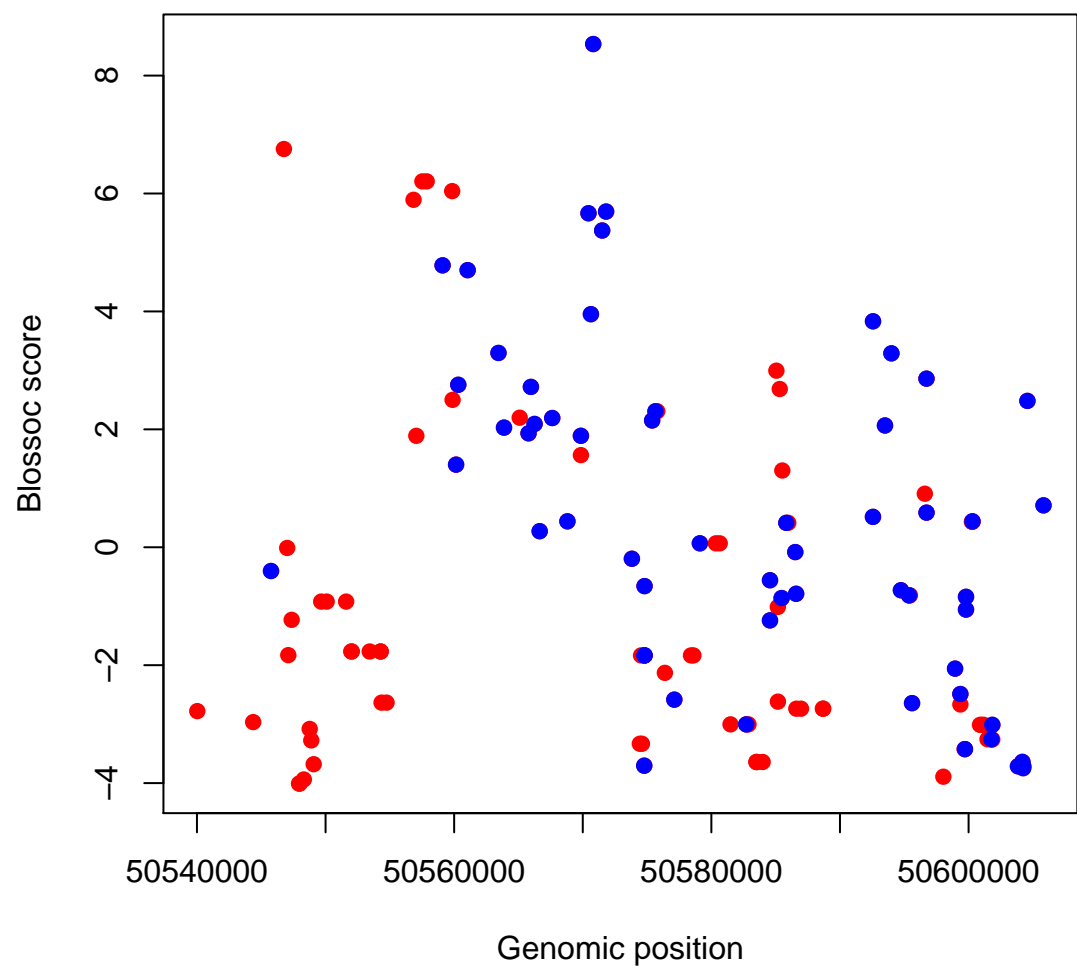

Supplement: MOESM3 [file 9450646]
